# Supplementary material for: Real-time observation of molecular flattening and intersystem crossing in [(DPEPhos)Cu(i)(PyrTet)] via ultrafast UV/Vis- and mid-IR spectroscopy on solution and solid samples
Source: Royal Society of Chemistry journal article supplement (doi:10.1039/c9cp05749h), 2020-01-01
Supplement: c9cp05749h1.pdf [file c9cp05749h1.pdf]

**Electronic supplementary information (ESI)**

**Real-Time Observation of Molecular Flattening and Intersystem Crossing in  
[(DPEPhos)Cu(I)(PyrTet)] *via* Ultrafast UV/Vis- and mid-IR Spectroscopy on  
Solution and Solid Samples**

Merten Grupe,<sup>a</sup> Florian Bäßler,<sup>a</sup> Maximilian Theiß,<sup>a</sup> Jasmin M. Busch,<sup>c</sup> Fabian Dietrich,<sup>b†</sup>  
Daniel Volz,<sup>c</sup> Markus Gerhards,<sup>b</sup> Stefan Bräse<sup>c,d</sup> and Rolf Diller<sup>\*a</sup>

<sup>a</sup> Physics Department, TU Kaiserslautern, Erwin-Schrödinger-Straße 46, 67663 Kaiserslautern,  
Germany. E-mail: diller@physik.uni-kl.de; Tel: +49 631 2052323

<sup>b</sup> Chemistry Department and Research Center Optimas, TU Kaiserslautern, Erwin-Schrödinger-Straße  
52, 67663 Kaiserslautern, Germany

<sup>c</sup> Institute of Organic Chemistry, Karlsruhe Institute of Technology, Fritz-Haber-Weg 6, 76131  
Karlsruhe, Germany

<sup>d</sup> Institute of Biological and Chemical Systems - Functional Molecular Systems, IBCS - FMS,  
Karlsruhe Institute of Technology, Hermann-von-Helmholtz-Platz 1,  
D-76344 Eggenstein-Leopoldshafen, Germany

<sup>†</sup> Present address: Núcleo Milenio MultiMat & Physics Department, Universidad de La Frontera,  
Francisco Salazar 01145, Temuco, Chile

**\*Corresponding Authors**

E-mail: diller@physik.uni-kl.de; Fax: +49 631 205-3902; Phone: +49 631 205-2323,

## Figures:

### Static spectra:

- S1: Static UV/Vis spectra of **1** in DCM, ACN, THF, DMSO, EtOH  
S2: ATR-IR spectrum of **1** as neat powder.  
S3 - S9: 2D static luminescence excitation spectra of **1** in ACN, DMSO, EtOH, DCM, THF, as neat and PMMA film.

### Time resolved spectra:

- S10 - S14: UV/Vis transient absorption difference spectra, decay associated spectra and absorption transients of **1** in THF, ACN, EtOH, DMSO and as PMMA film.  
S15: Comparison of tetra- and triexponential analysis of the absorption transient of **1** at 440 nm obtained in ACN.  
S16: Mid-IR transient absorption difference spectra of **1** in DCM-D<sub>2</sub> at selected time delays.

### TD-DFT (B3LYP/def2-TZVP) results:

- S17: Calculated energies of relevant electronic states and coordination geometries of the S<sub>0</sub>, relaxed S<sub>1</sub> and T<sub>1</sub> state.  
S18: Calculated twist of PyrTet unit in S<sub>0</sub>, S<sub>1</sub> and T<sub>1</sub>.  
S19: Calculated Cu-N bond shortening in S<sub>0</sub>, S<sub>1</sub> and T<sub>1</sub>.  
S20: Calculated HOMO-1, HOMO, LUMO, LUMO+1 and LUMO+2 of **1**.  
S21: Calculated UV/Vis ground state absorption spectrum compared with experimental data.

### Sample integrity:

- S22: Decadic extinction coefficient  $\epsilon$  of **1**, free PyrTet and free DPEPhos ligand in DCM.  
S23: Static UV/Vis spectra of **1** (in DCM) before and after a fs-TA measurement under realistic conditions.  
S24: Luminescence excitation spectra of **1** before and after a fs-TA measurement.  
S25: Luminescence excitation spectra of the free DPEPhos ligand in DCM, ACN, THF, DMSO and EtOH.  
S26: Luminescence excitation spectrum of the free PyrTet ligand in DCM.  
S27: Luminescence excitation spectrum of [Cu(PyrTet)<sub>2</sub>] in DCM.  
S28: Static UV/Vis spectrum of [Cu(PyrTet)<sub>2</sub>] in DCM.

## Tables:

- S1: Decadic extinction coefficient  $\epsilon$  of **1** at 340 nm.  
S2: Viscosity, dipole moment and relative permittivity of the used solvents.  
S3: Assignments of calculated IR-vibrational modes.  
S4: Vertical transition energies for different ligand geometries.  
S5: Energies of triplet states below S<sub>1</sub> (calculated for S<sub>0</sub> geometry).  
S6: Calculated electronic transitions with the associated vertical excitation energy, oscillator strength and the contributing orbitals.

**Static spectra:**

Static UV/Vis spectra of **1** in DCM, ACN, THF, DMSO, EtOH.

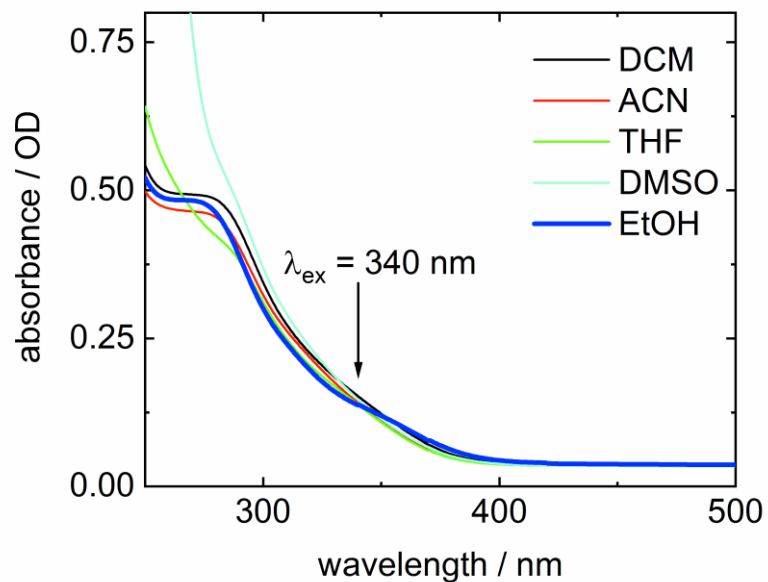

**Figure S1.** Ground state absorbance spectra of **1** dissolved in DCM ( $c = 0.021 \text{ mmol L}^{-1}$ ), ACN ( $c = 0.016 \text{ mmol L}^{-1}$ ), THF ( $c = 0.016 \text{ mmol L}^{-1}$ ), DMSO ( $c = 0.017 \text{ mmol L}^{-1}$ ) and EtOH ( $c = 0.020 \text{ mmol L}^{-1}$ ).

**Table S1.** The decadic extinction coefficient  $\epsilon$  of **1** at 340 nm in various solvents as determined *via* absorbance measurement at given concentration.

| Solvent | $\epsilon$ at 340 nm / $10^4 \text{ M}^{-1} \text{ cm}^{-1}$ |
|---------|--------------------------------------------------------------|
| ACN     | $0.66 \pm 0.13$                                              |
| DMSO    | $0.61 \pm 0.03$                                              |
| THF     | $0.64 \pm 0.03$                                              |
| EtOH    | $0.48 \pm 0.03$                                              |
| DCM     | $0.58 \pm 0.03$                                              |

**Table S2.** Viscosity, dipole moment and relative permittivity of the used solvents.

| Solvent | Viscosity <sup>1</sup><br>/mPa s at 25 °C | Dipolemoment <sup>1</sup><br>/Debye | Rel. permittivity <sup>1</sup> |
|---------|-------------------------------------------|-------------------------------------|--------------------------------|
| DCM     | 0.413                                     | 1.60                                | 8.93 (25 °C)                   |
| EtOH    | 1.074                                     | 1.69                                | 25.3 (20 °C)                   |
| DMSO    | 1.987                                     | 3.96                                | 47.24 (20 °C)                  |
| ACN     | 0.334                                     | 3.92                                | 36.64 (20 °C)                  |
| THF     | 0.456                                     | 1.75                                | 7.52 (22 °C)                   |

#### Mid-IR ground state spectra.

Figure 1b (main text) and Figure S2 show the mid-IR absorption spectra of **1** in DCM-D<sub>2</sub> and as neat powder, respectively. Overall, they are very similar, suggesting correspondingly similar molecular structure in solution and as solid. However, below 1200 cm<sup>-1</sup>, in solution relatively unstructured and broad absorbance features are in contrast to rather structured and narrow bands in the solid, suggesting strong dynamic interaction of solvent molecules with H-rocking and -scissoring vibrations in this region.

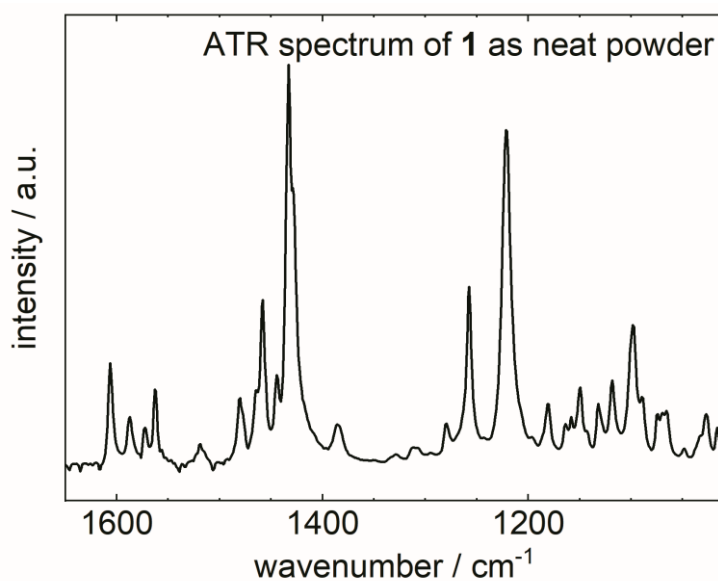

**Figure S2.** ATR-IR electronic ground state spectrum of **1** as neat powder.

2D static luminescence excitation spectra of **1** in ACN, DMSO, EtOH, DCM, THF, as neat and PMMA film.

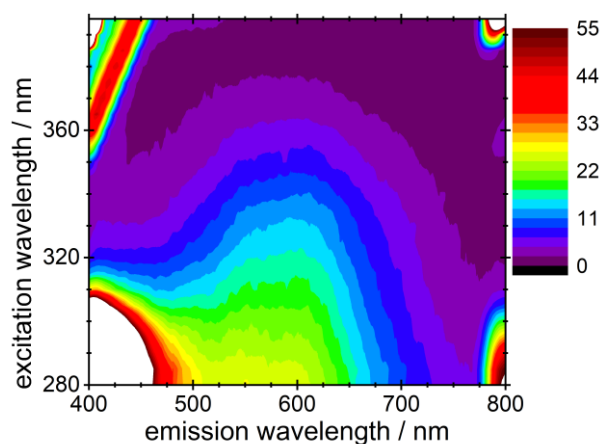

**Figure S3.** Static 2D luminescence excitation spectrum of **1** in ACN with OD = 0.12 (1 cm path) at 340 nm (ignore (scattering) artifacts in corners).

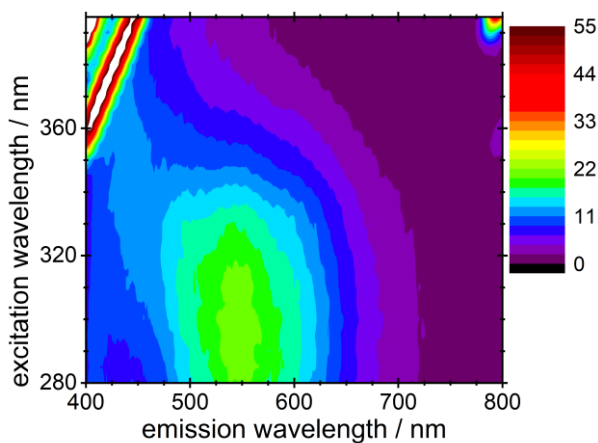

**Figure S4.** Static 2D luminescence excitation spectrum of **1** in DMSO with OD = 0.15 (1 cm path) at 340 nm (ignore scattering artifacts in upper left/right part).

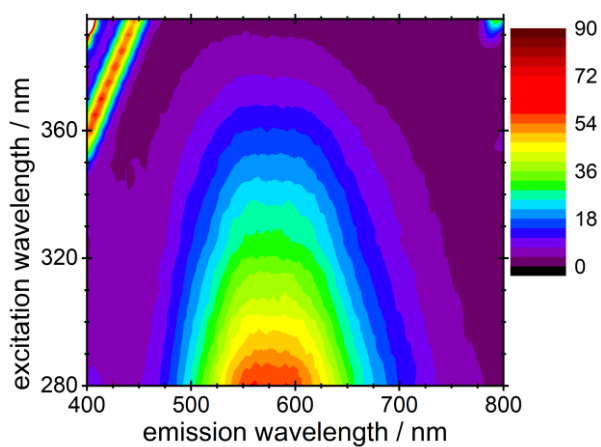

**Figure S5.** Static 2D luminescence excitation spectrum of **1** in EtOH with OD = 0.09 (1 cm path) at 340nm (ignore scattering artifacts in upper left/right part).

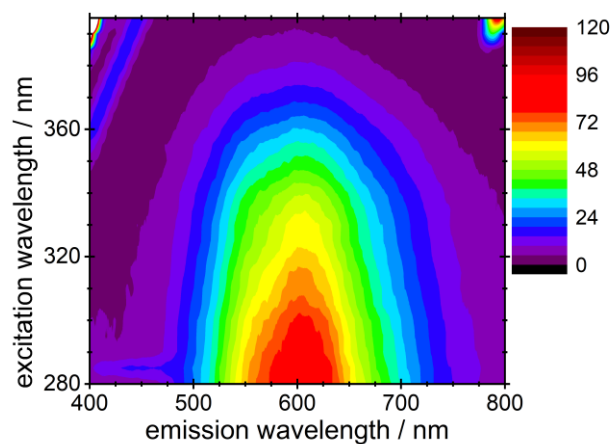

**Figure S6.** Static 2D luminescence excitation spectrum of **1** in DCM with OD = 0.13 (1 cm path) at 340 nm (ignore scattering artifacts in upper left/right part).

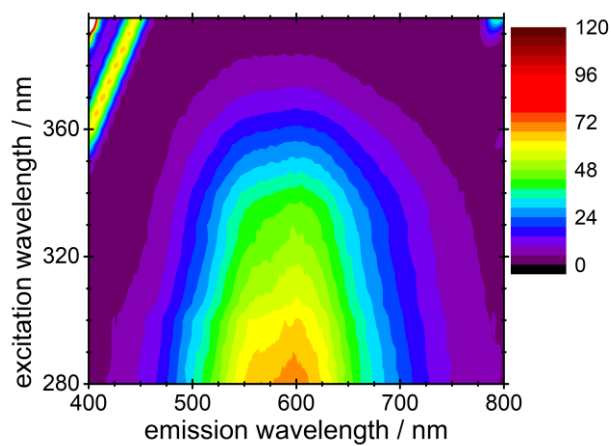

**Figure S7.** Static 2D luminescence excitation spectrum of **1** in THF with OD = 0.16 (1 cm path) at 340 nm (ignore scattering artifacts in upper left/right part).

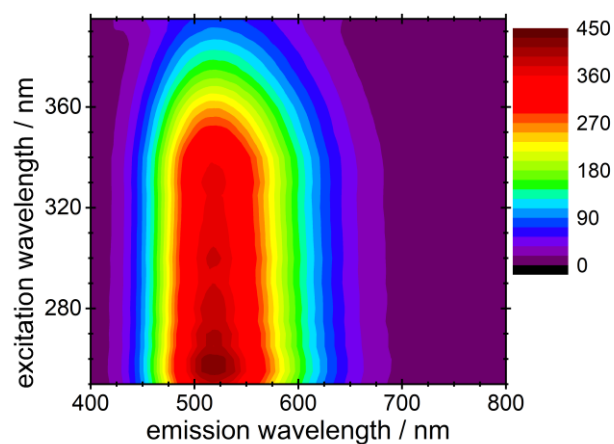

**Figure S8.** Static 2D luminescence excitation spectrum of **1** as neat film with OD = 0.59 at 340 nm.

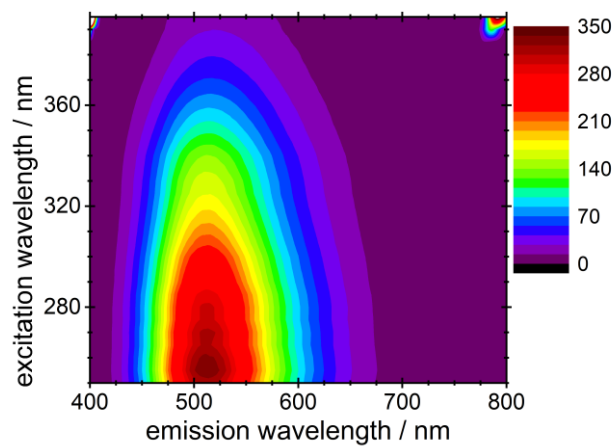

**Figure S9.** Static 2D luminescence excitation spectrum of **1** embedded in a PMMA matrix with OD = 0.19 at 340 nm (ignore scattering artifacts in upper left/right part).

### Time resolved spectra:

UV/Vis transient absorption difference spectra, decay associated spectra and absorbance transients of **1** in THF, ACN, EtOH, DMSO and as PMMA film.

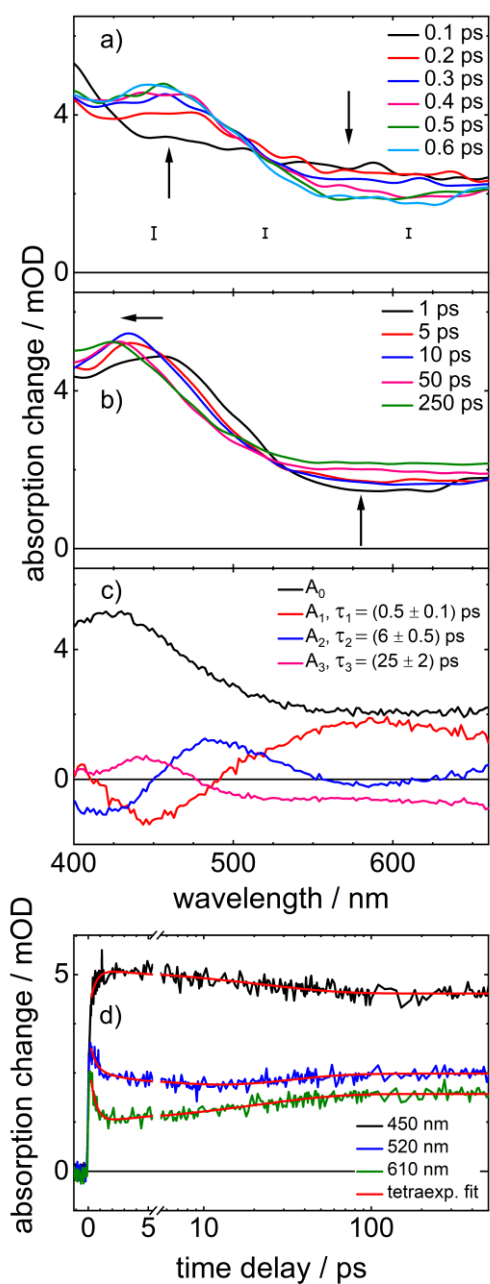

**Figure S10:** UV/Vis transient absorption of **1** in THF. a) sub-ps difference spectra; b) 1-250 ps difference spectra; c) DAS. Error bars for a) and b) are depicted in a) for selected wavelengths (450 nm, 520 nm, 610 nm). Data in a) and b) are smoothed *via* 10 point FFT-filter. Arrows indicate evolution of absorbance strength. d) absorbance transients for selected wavelengths (450 nm, 520 nm, 610 nm) up to 500 ps, for  $t > 5.5$  ps logarithmic scale.

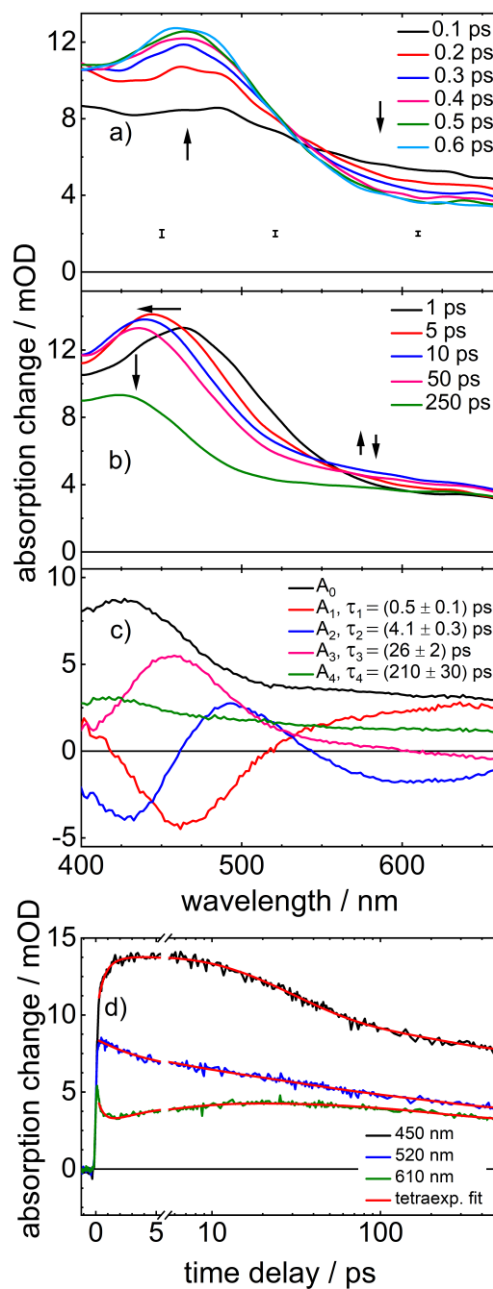

**Figure S11:** UV/Vis transient absorption of **1** in ACN. a) sub-ps difference spectra; b) 1-250 ps difference spectra; c) DAS. Error bars for a) and b) are depicted in a) for selected wavelengths (450 nm, 520 nm, 610 nm). Data in a) and b) are smoothed *via* 10 point FFT-filter. Arrows indicate evolution of absorbance strength. d) absorbance transients for selected wavelengths (450 nm, 520 nm, 610 nm) up to 500 ps, for  $t > 5.5$  ps logarithmic scale.



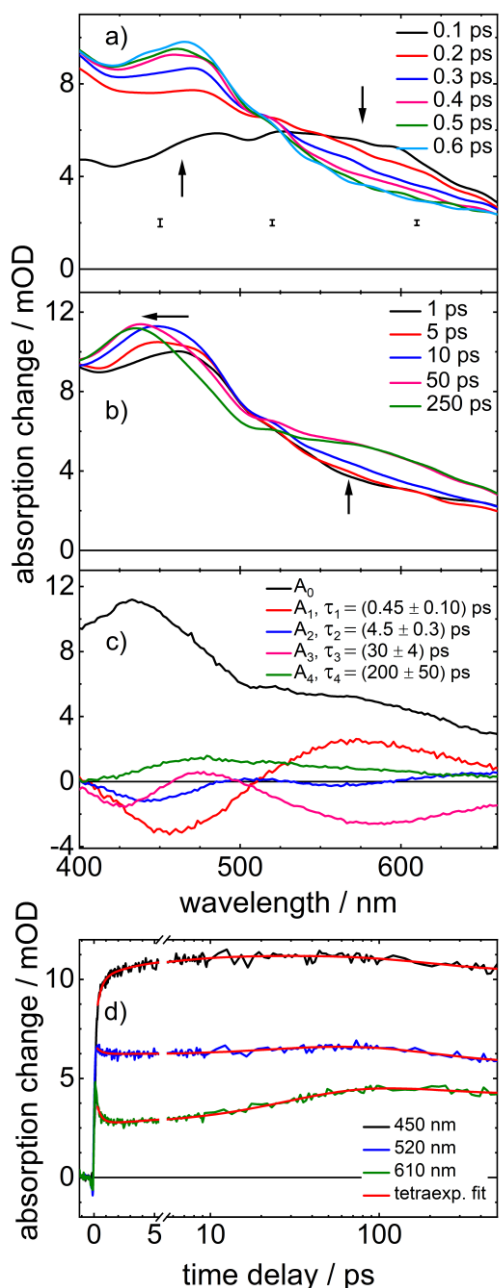

**Figure S12:** UV/Vis transient absorption of **1** in EtOH. a) sub-ps difference spectra; b) 1-250 ps difference spectra; c) DAS. Error bars for a) and b) are depicted in a) for selected wavelengths (450 nm, 520 nm, 610 nm). Data in a) and b) are smoothed *via* 10 point FFT-filter. Arrows indicate evolution of absorbance strength. d) absorbance transients for selected wavelengths (450 nm, 520 nm, 610 nm) up to 500 ps, for  $t > 5.5$  ps logarithmic scale.

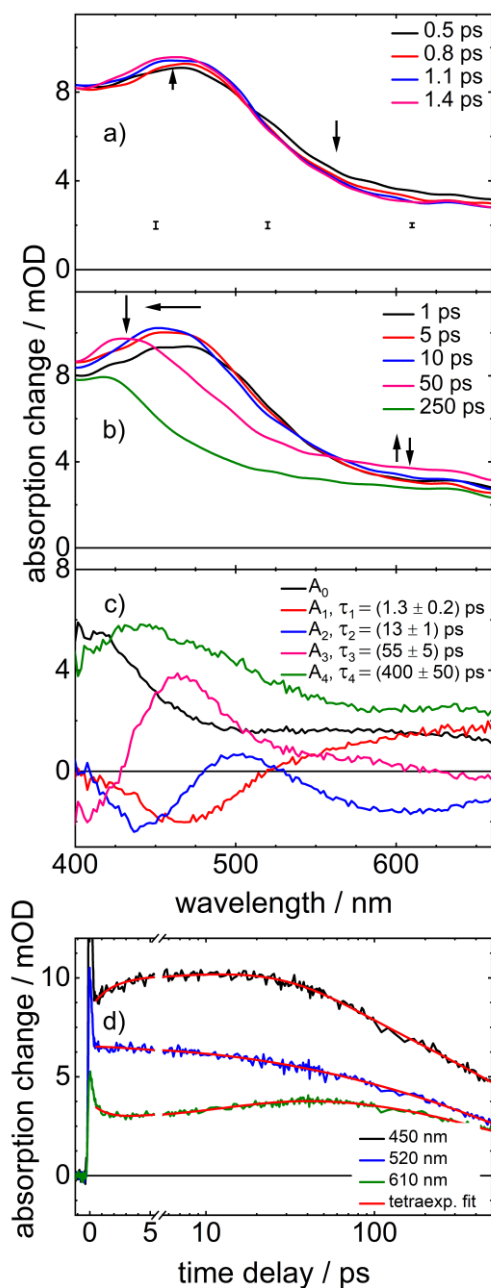

**Figure S13:** UV/Vis transient absorption of **1** in DMSO. a) sub-ps difference spectra (Data  $< 0.5$  ps not shown, obscured by strong cross phase modulation); b) 1-250 ps difference spectra; c) DAS. Error bars for a) and b) are depicted in a) for selected wavelengths (450 nm, 520 nm, 610 nm). Data in a) and b) are smoothed *via* 10 point FFT-filter. Arrows indicate evolution of absorbance strength. d) absorbance transients for selected wavelengths (450 nm, 520 nm, 610 nm) up to 500 ps, for  $t > 5.5$  ps logarithmic scale.

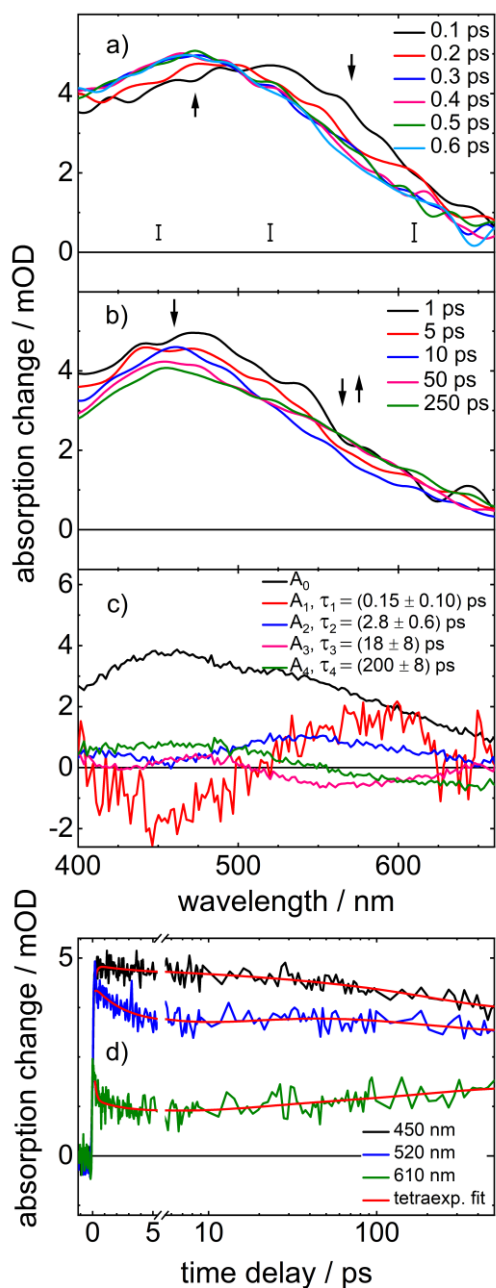

**Figure S14:** UV/Vis transient absorption of **1** as PMMA film. a) sub-ps difference spectra; b) 1-250 ps difference spectra; c) DAS. Error bars for a) and b) are depicted in a) for selected wavelengths (450 nm, 520 nm, 610 nm). Data in a) and b) are smoothed *via* 10 point FFT-filter. Arrows indicate evolution of absorbance strength. d) absorbance transients for selected wavelengths (450 nm, 520 nm, 610 nm) up to 500 ps, for  $t > 5.5$  ps logarithmic scale.

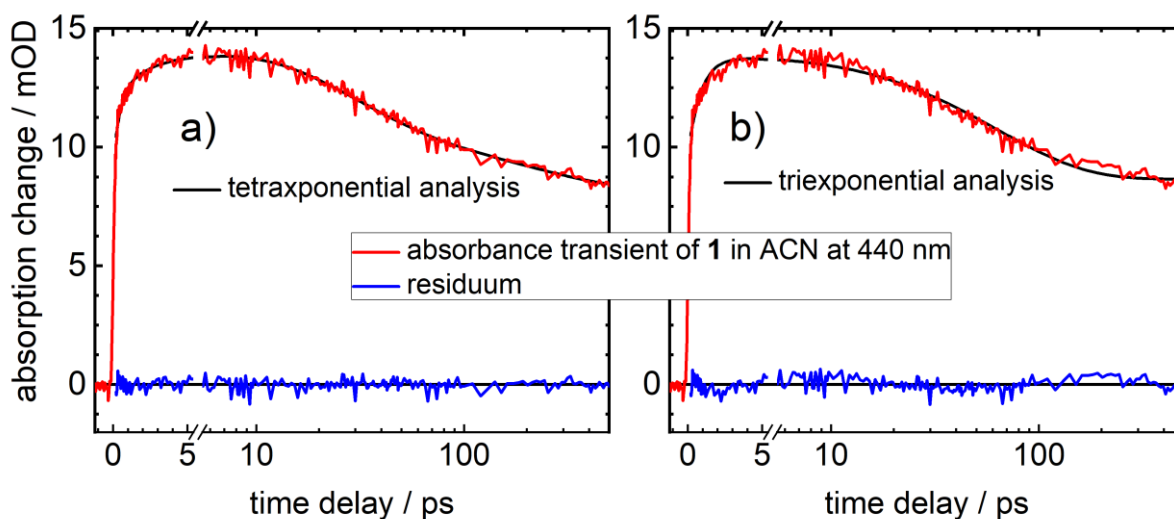

**Figure S15.** Absorbance transient of **1** in ACN at 440 nm, after excitation at 340 nm together with a) tetraexponential and a b) triexponential analysis as well as the respective fit residua. Note the significantly non-zero residuum of the triexponential analysis, in particular in the time regime of  $\tau_1$  and  $\tau_2$  (below ca. 20 ps) and of  $\tau_4$  (above ca. 100 ps).

Comparison of Figure S15 a) and b) shows that an additional (forth) time constant alters the short time constants. The determination of  $\tau_4$  is probably not sufficiently accurate, however, it leads to a more precise result for shorter time scales. Note,  $A_4$  ( $\tau_4$ ) could not clearly be assigned to a specific photophysical process.

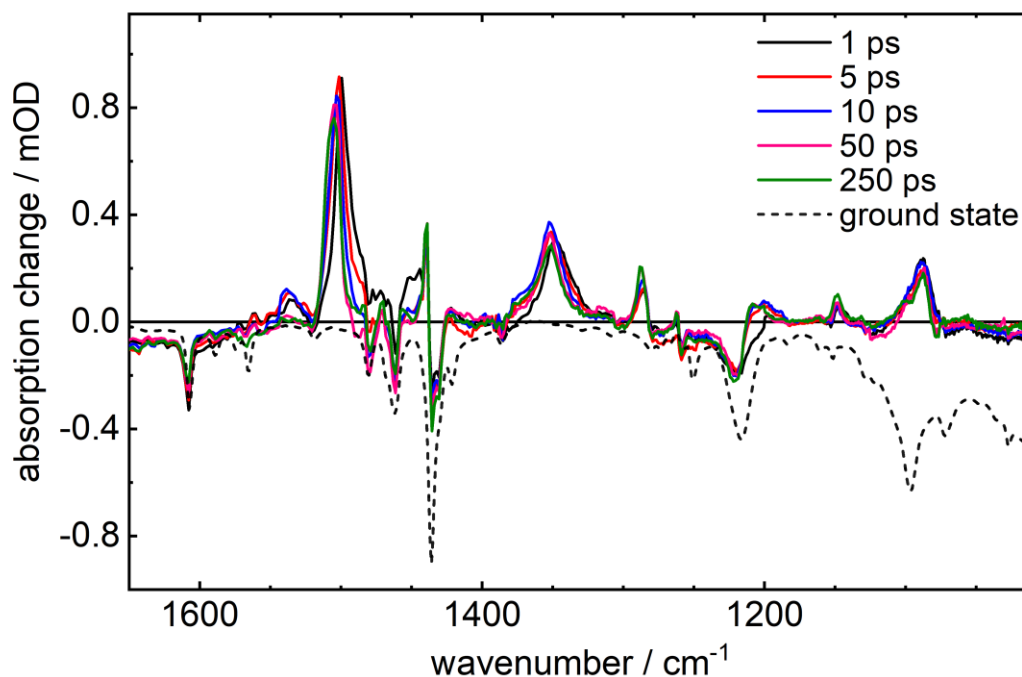

**Figure S16.** Overview of mid-IR difference spectra of **1** in DCM-D<sub>2</sub> at selected time delays. The dashed line denotes the inverted ground state spectrum.

**TD-DFT (B3LYP/def2-TZVP) results:**

**Table S3.** Assignments of selected strong and medium IR-vibrational modes of **1** ( $S_0$ ,  $S_1$ ,  $T_1$ ) as calculated (scaled by a factor of 0.98).

| Wavenumber / cm <sup>-1</sup> | Vibrational mode and electronic state                                                         |
|-------------------------------|-----------------------------------------------------------------------------------------------|
| 1088                          | ring vib. of phenyls ( $S_0$ , $S_1$ , $T_1$ ) and PyrTet ( $S_1$ & $T_1$ )                   |
| ≈1160                         | breathing of tetrazole, ring vib. of pyridyl, H-scissoring ( $S_1$ & $T_1$ )                  |
| 1211 & 1216                   | breathing vib. of tetrazole, H-scissoring and ring vib. of pyridyl ( $S_1$ & $T_1$ )          |
| 1227                          | vib. of ether bridge and ring vib. on bridged phenyls ( $S_0$ )                               |
| 1243                          | vib. of ether bridge and ring vib. of bridged phenyls ( $S_1$ & $T_1$ )                       |
| 1288                          | ring vib. and H-rocking of pyridyl, minor ring vib and H-rocking of phenyls ( $S_1$ & $T_1$ ) |
| 1334                          | ring vib and H-scissoring of pyridyl, H-rocking of phenyls ( $S_1$ & $T_1$ )                  |
| 1370                          | ring vib. of tetrazole, H-rocking on pyridyl ( $S_1$ & $T_1$ )                                |
| 1432 - 1446                   | H-rocking of phenyls, contributions of ring vib. of PyrTet ( $S_0$ )                          |
| 1461 - 1467                   | H-rocking and ring vib. of O-bridged phenyls and of PyrTet ( $S_0$ , $S_1$ , $T_1$ )          |
| ≈1509                         | C-C stretch between pyridyl and tetrazole, ring vib. of PyrTet ( $S_1$ & $T_1$ )              |
| 1608                          | ring vib. of pyridyl ( $S_0$ )                                                                |

**Table S4.** Vertical transition energies for different complex geometries (*cf.* Figure S17).

| Transition            | Complex geometry               | Energy / $\text{cm}^{-1}$ |
|-----------------------|--------------------------------|---------------------------|
| $S_0 \rightarrow S_1$ | $S_0$ -geometry                | 28022                     |
| $S_0 \rightarrow T_1$ | $S_0$ -geometry                | 26034                     |
| $S_0 \leftarrow S_1$  | $S_1$ -geometry <sup>[a]</sup> | 15023                     |
| $S_0 \leftarrow T_1$  | $T_1$ -geometry <sup>[b]</sup> | 14204                     |

<sup>[a]</sup> $E(S_1 \text{ in } S_0\text{-geometry}) - E(S_1 \text{ in } S_1\text{-geometry}) = 6430 \text{ cm}^{-1}$

<sup>[b]</sup> $E(S_1 \text{ in } S_0\text{-geometry}) - E(T_1 \text{ in } T_1\text{-geometry}) = 7949 \text{ cm}^{-1}$

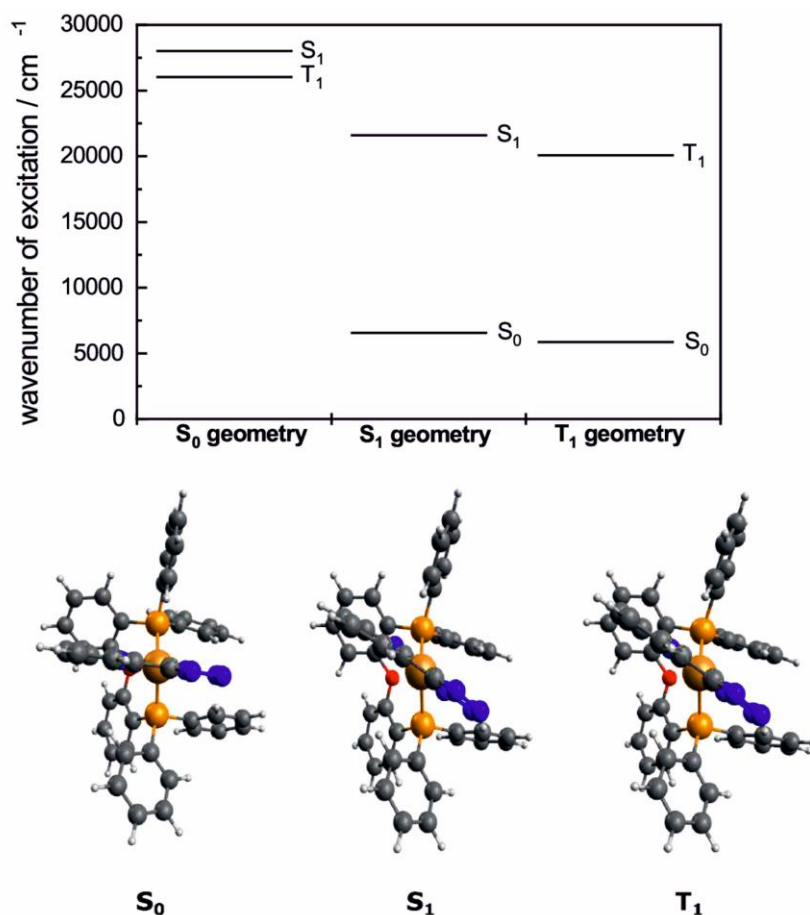

**Figure S17.** Calculated energies of relevant electronic states and coordination geometries of the  $S_0$ , relaxed  $S_1$  and  $T_1$  state. Dihedral angle between P-Cu-P- and N-Cu-N-plane for  $S_0$ :  $92.5^\circ$ ,  $S_1$ :  $51.4^\circ$ ,  $T_1$ :  $54.5^\circ$ .

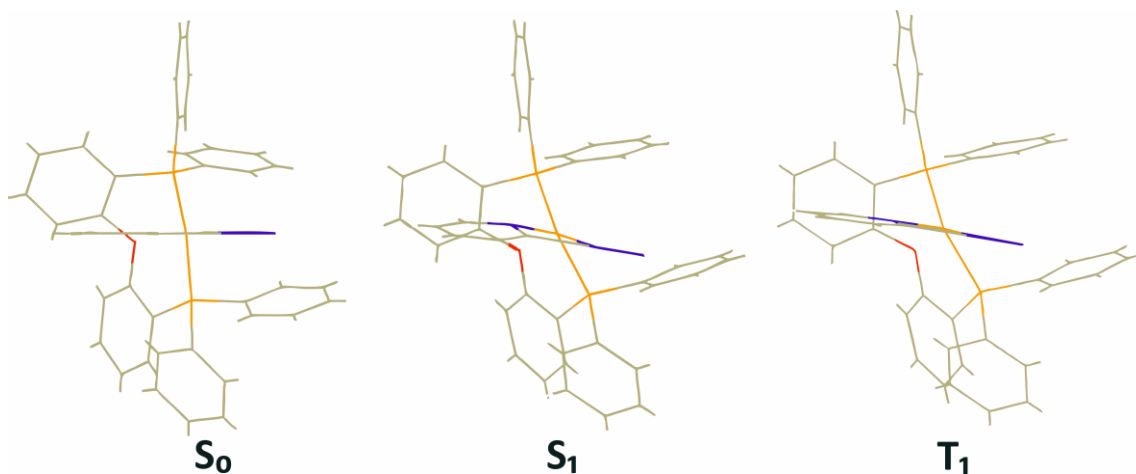

**Figure S18.** Calculated PyrTet ligand twist in the  $S_1$ - and  $T_1$ -state. Strongest twist is present in the  $S_1$  state, no twist is present in the  $S_0$  state.

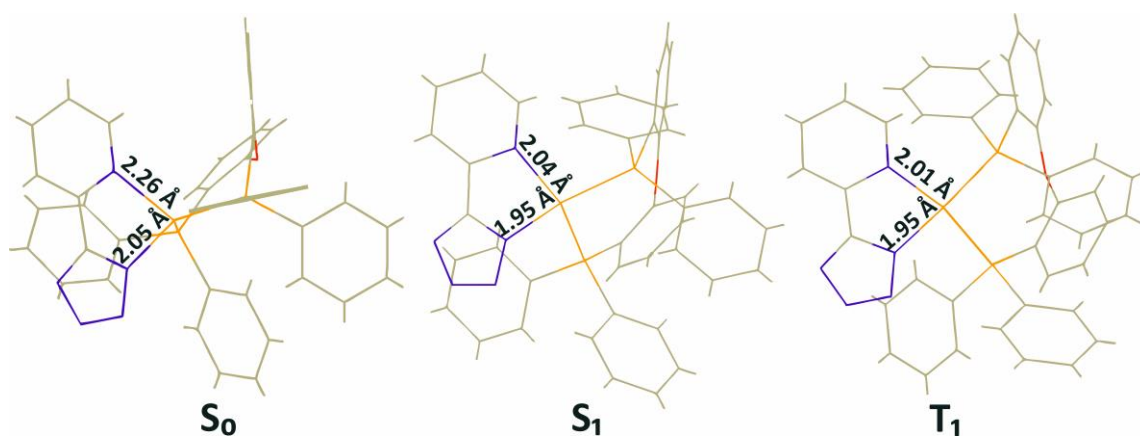

**Figure S19.** Structural change of the PyrTet unit along a rocking coordinate is induced by the different shortening of the respective Cu-N bonds in the relaxed  $S_1$  state with respect to  $S_0$ . This rocking motion adds a contribution to the observed anisotropy changes  $\Delta r(t)$  as described in the manuscript.

**Table S5.** Calculated energies of triplet states below  $S_1$  (calculated for  $S_0$  geometry).

| Triplet state | Energy / $\text{cm}^{-1}$ |
|---------------|---------------------------|
| $T_5$         | 27618                     |
| $T_4$         | 27106                     |
| $T_3$         | 26730                     |
| $T_2$         | 26581                     |
| $T_1$         | 26034                     |

**Table S6.** Calculated electronic transitions with associated vertical excitation energy, oscillator strength and the orbitals (*cf.* Figure S20) contributing to the transition (with its percentage). Orbitals contributing less than 3 % are not listed. The excitation energies were scaled by a factor of 1.065 to yield best accordance with measurements (*cf.* Figure S21). This may compensate the fact that the calculations were performed in vacuum and at 0 K. The non-scaled energies are given in parentheses.

| Electronic transition | Vertical excitation energy / $\text{cm}^{-1}$ | Oscillator strength | Orbital transition (with its percentage) |
|-----------------------|-----------------------------------------------|---------------------|------------------------------------------|
| $S_0 \rightarrow S_1$ | 29843<br>(28022)                              | 0.0448              | 193 $\rightarrow$ 195 (51.8 %)           |
|                       |                                               |                     | 193 $\rightarrow$ 194 (27.7 %)           |
|                       |                                               |                     | 192 $\rightarrow$ 195 (15.7 %)           |
| $S_0 \rightarrow S_2$ | 30065<br>(28230)                              | 0.0139              | 193 $\rightarrow$ 194 (68.5 %)           |
|                       |                                               |                     | 193 $\rightarrow$ 195 (27.0 %)           |
| $S_0 \rightarrow S_3$ | 30871<br>(28987)                              | 0.0236              | 192 $\rightarrow$ 195 (69.1 %)           |
|                       |                                               |                     | 193 $\rightarrow$ 195 (19.2 %)           |
|                       |                                               |                     | 192 $\rightarrow$ 194 (4.7 %)            |
| $S_0 \rightarrow S_4$ | 31350<br>(29437)                              | 0.0111              | 193 $\rightarrow$ 196 (96.1 %)           |

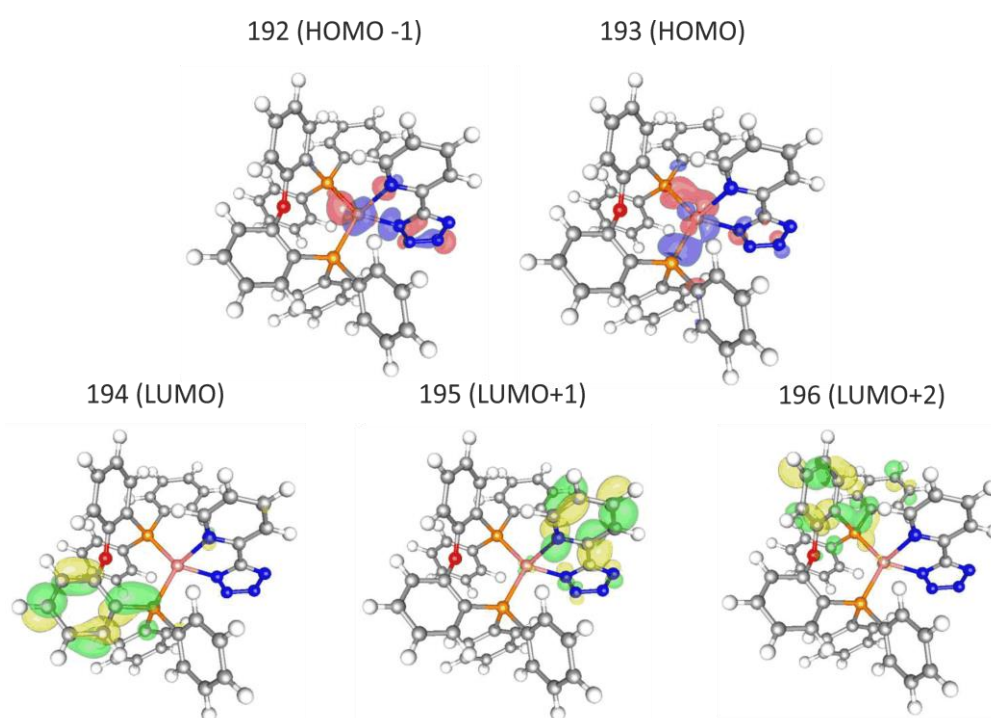

**Figure S20.** Images of the HOMO-1, HOMO (192, 193) and LUMO, LUMO+1, LUMO+2 (194, 195, 196) localization. For their contribution to first four singlet transitions *cf.* Table S6.

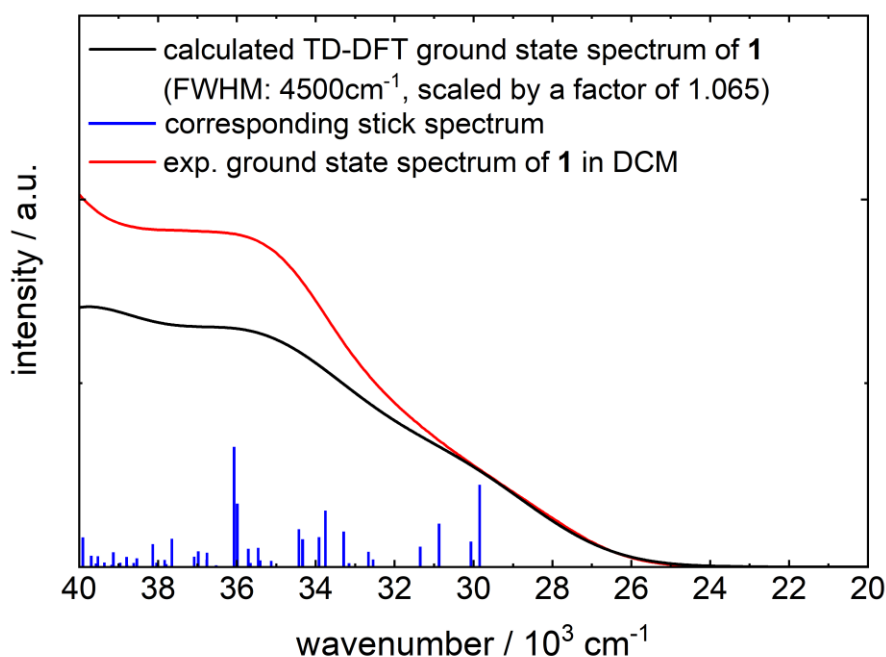

**Figure S21.** Comparison of the calculated and measured (in DCM) ground state absorbance spectrum of **1**. The calculated line spectrum (blue) was convolved with a Gaussian function with a FWHM of  $4500\text{ cm}^{-1}$  (black). Calculated energies are scaled by a factor of 1.065.

The  $S_0 - S_1$  transition is mainly dominated by transfer of electron density from the copper center (HOMO (193) and HOMO-1 (192)) to the PyrTet moiety (LUMO+1 (195)) which sums up to 67.5 %. Considering the scaled vertical transition energies (which are in good accordance with the experimental ground state spectrum of **1**, cf. Figure S21) and the related oscillator strength, it is most reasonable that we mainly address the  $S_0 - S_1$  transition with our excitation wavelength of 340 nm. Possibly, we also address higher electronic transitions where the unoccupied acceptor orbital (194 and 196) is not located on the PyrTet ligand ( $S_0 - S_2, S_0 - S_4$ ), however, the oscillator strengths for those transitions are comparably small (three to four times smaller compared to the  $S_0 - S_1$  transition) with respect to electronic transitions which mainly address the acceptor orbital (195) on the PyrTet Ligand ( $S_0 - S_1, S_0 - S_3$ ). Thus, the favoured and probably most significantly addressed MLCT mainly transfers electron density from the copper center on the PyrTet ligand.

### Sample Integrity

Much care was taken to make sure that during measurements no significant dissociation of **1** with release of free ligands or the formation of  $[\text{Cu}(\text{PyrTet})_2]$  occurred. To rule out any influence of possible free ligands on the fs-TA data we have measured the extinction coefficient  $\epsilon(\lambda)$  for PyrTet and DPEPhos in DCM. The (small) extinction coefficient of PyrTet and DPEPhos (at the excitation wavelength of 340 nm) as compared to **1** is shown in Figure S22. Further, we have checked the static UV/Vis spectrum of **1** before and after a fs-TA measurement under realistic conditions. The neglectable degree of sample degradation is demonstrated in Figure 23. Only minor changes are discernible. Note that the absorbance of **1** at 340 nm essentially includes no contributions from



the free ligands (*cf.* Figure S22). Note as well, that in cases of observed sample degradation ( $\Delta A_{340} < 10\%$ ), we have exchanged the sample accordingly.

Further, we have employed luminescence excitation spectra, taken from samples of **1** in DCM for fs-TA before and after measurement under realistic conditions (*cf.* Figure S24), as a sensitive mean to check for dissociation of **1** or the conceivable formation of  $[\text{Cu}(\text{PyrTet})_2]$ .<sup>1</sup> The luminescence of the free ligands (*cf.* Figure S25 and S26) and of  $[\text{Cu}(\text{PyrTet})_2]$  (Figure S27) is not discernable in that of **1** (after fs-TA, *cf.* Figure S24). The luminescence spectra of DPEPhos were recorded in all used solvents. For the free PyrTet and  $[\text{Cu}(\text{PyrTet})_2]$  we have used only DCM, due to their very low solubility in all used solvents. The electronic ground state absorption spectrum of  $[\text{Cu}(\text{PyrTet})_2]$  is shown in Figure S28 (Note that the relatively large offset is owed to scattering by undissolved sample with low solubility of  $< 0.018 \text{ mmol L}^{-1}$ ). For the recording of the luminescence excitation spectra excitation only above 275 nm was used, otherwise slight sample degradation was observed.

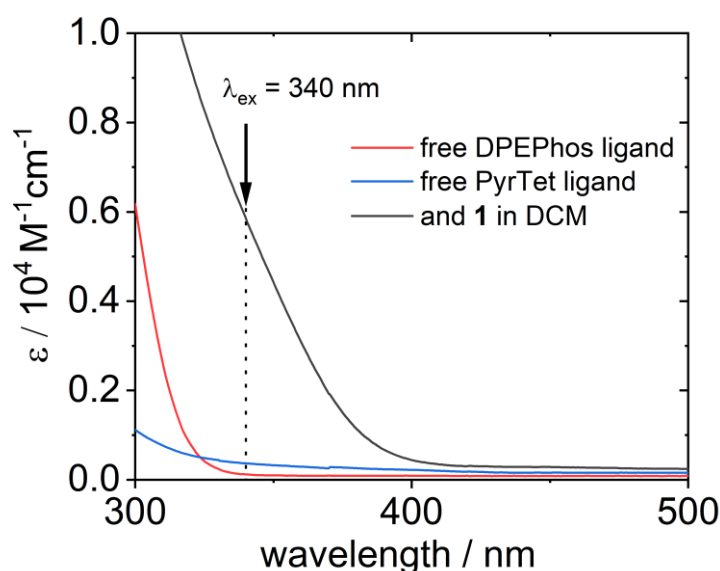

**Figure S22:** Extinction coefficient  $\varepsilon(\lambda)$  for DPEPhos, PyrTet and **1** in DCM for comparison.

<sup>1</sup>Synthesis according to Zhang et al., Acta Cryst. 2006, E62, m2908–m2909; Qiu et al., Acta Cryst. 2007, E63, m2894 by J. Busch, S. Bräse (KIT Karlsruhe, Germany): Gloves, safety specs and a lab coat to be worn throughout. The PyrTet ligand (0.200 g, 1.36 mmol, 2.00 eq.),  $\text{K}_2\text{CO}_3$  (0.282 g, 2.04 mmol, 3.00 eq.) and the colorless  $\text{CuSO}_4$  (0.108 g, 0.680 mmol, 1.00 eq.) were dissolved in 15 mL DCM (SPS). The suspension turned slightly blue and was heated to 90 °C for 15 h. The color of the suspension turned even more intense pale blue solution. The pale blue suspension was added on 100 mL DCM. 200 mL of distilled water were added. The blue solid went into the water layer. The DCM phase was separated and 200 mL EE were added to the water phase. The solid was also not soluble in EE. The EE phase was separated and the water phase was filtered off and was washed with water (100 mL total), acetone (60 mL), DCM (10 mL). The compound was slightly soluble in acetone and DCM. The pale blue powder was dried in vacuo. 0.159 g (0.446 mmol, 66 %) of the pale blue powder were obtained.

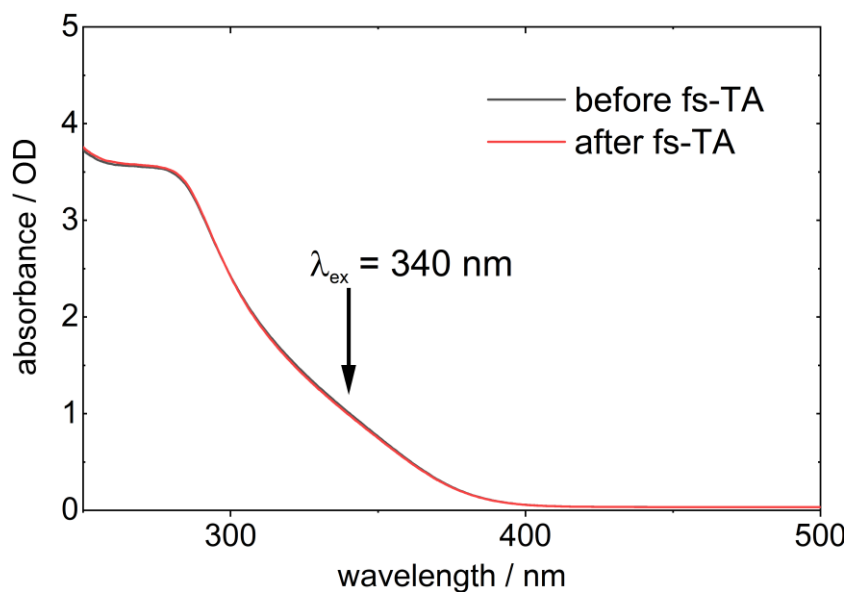

**Figure S23:** Absorption spectra of **1**/DCM samples used for fs-TA before and after measurement under realistic conditions.

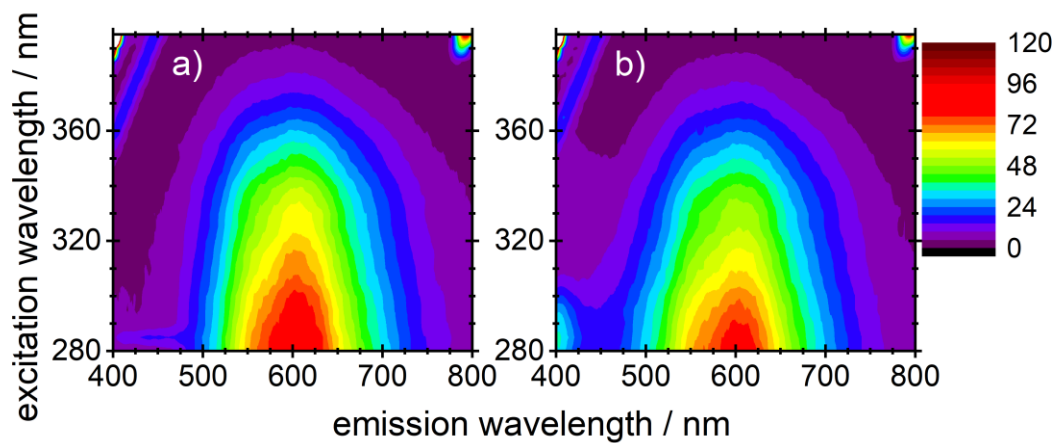

**Figure S24:** Luminescence excitation spectrum of **1** in DCM a) before and b) after a fs-TA measurement under realistic conditions ( $c = 0.02 \text{ mmol L}^{-1}$ , respectively, ignore scattering artifacts in upper left part).

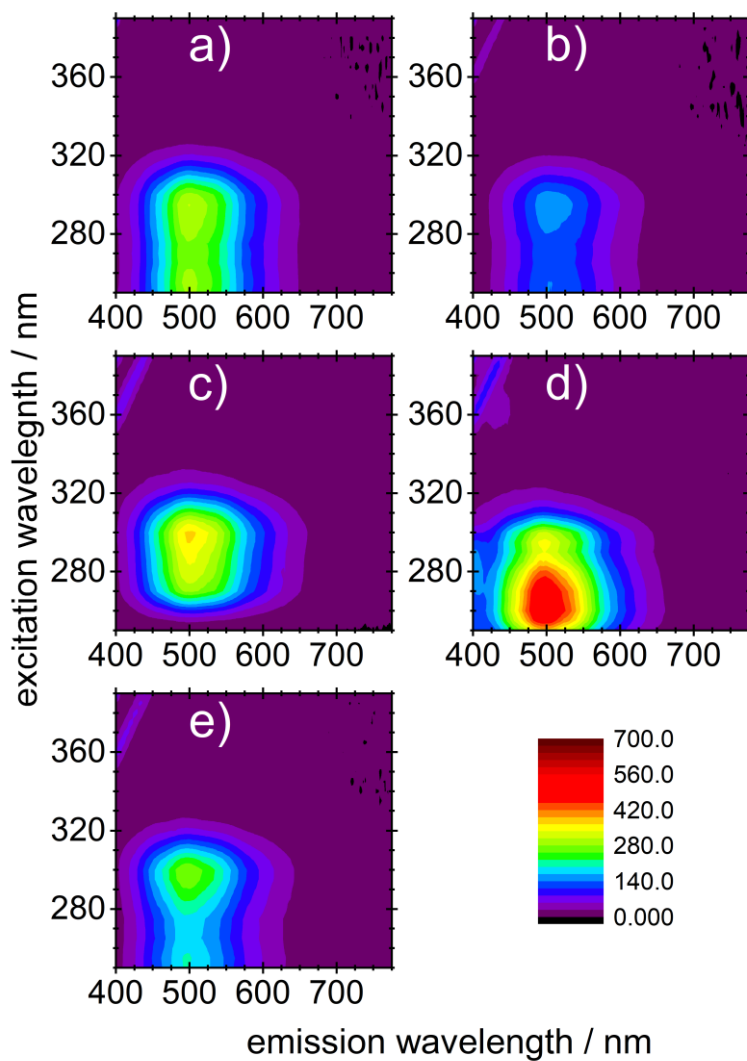

**Figure S25:** Luminescence excitation spectra of the free DPEPhos ligand in a) DCM ( $c = 0.058 \text{ mmol L}^{-1}$ ) b) ACN ( $c = 0.048 \text{ mmol L}^{-1}$ ) c) DMSO ( $c = 0.84 \text{ mmol L}^{-1}$ ) d) THF ( $c = 0.093 \text{ mmol L}^{-1}$ ) and e) EtOH ( $c = 0.093 \text{ mmol L}^{-1}$ ). For all used solvents the emission maximum is at ca. 500 nm (ignore scattering artifacts in upper left part).

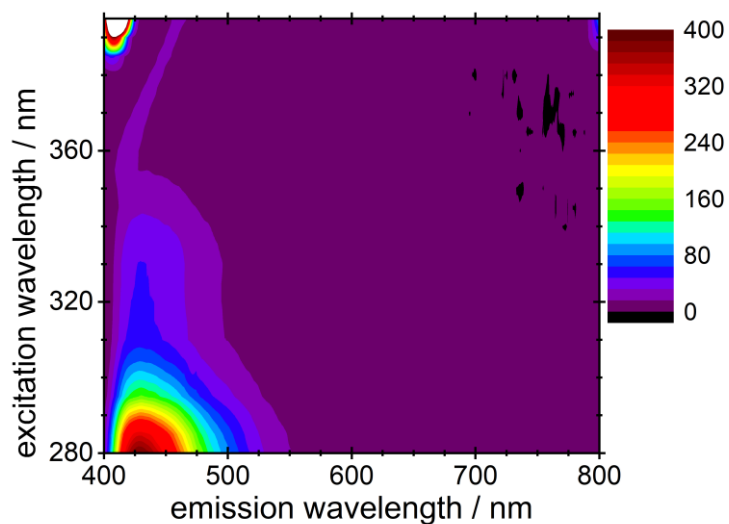

**Figure S26:** Luminescence excitation spectra of the free PyrTet ligand in DCM ( $c = 0.017 \text{ mmol L}^{-1}$ ). The emission maximum is at ca. 430 nm (ignore scattering artifacts in upper left/right part).

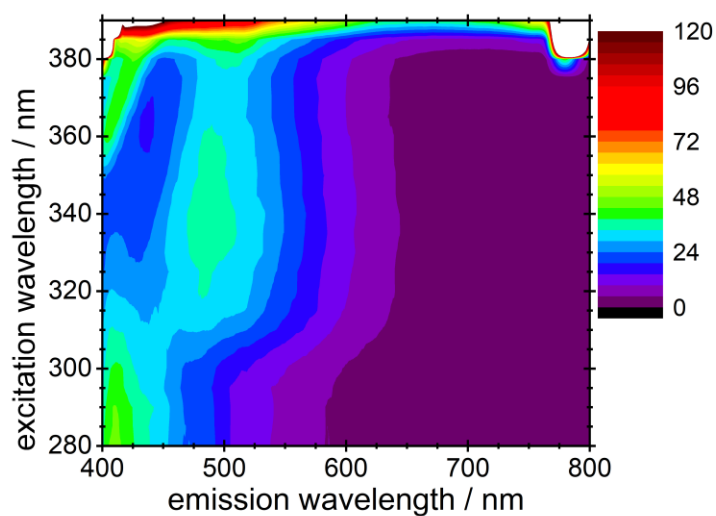

**Figure S27:** Luminescence excitation spectrum of  $[\text{Cu}(\text{PyrTet})_2]$  in DCM. ( $c \ll 0.018 \text{ mmol L}^{-1}$ , very dilute solution, ignore scattering artifacts in upper left/right part).

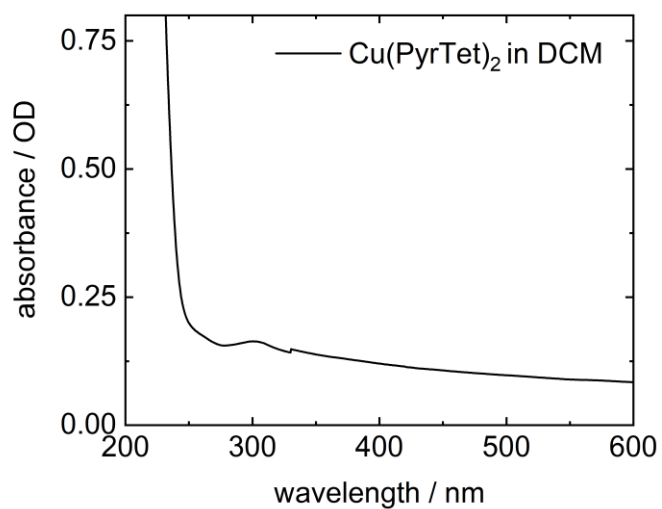

**Figure S28:** Electronic ground state absorption spectrum of [Cu(PyrTet)<sub>2</sub>] in DCM.  $c < 0.018 \text{ mmol L}^{-1}$ , not completely dissolved.

## REFERENCES

- 1 D. R. Lide, *CRC handbook of chemistry and physics, 88th edition*, CRC press, 2007.
